# Supplementary material for: Manta Net: The Golden Method for Sampling Surface Water Microplastics in Aquatic Environments
Source: Frontiers journal article supplement (doi:10.3389/fenvs.2022.811112), 2022-04-01
Supplement: Data_Sheet_1.docx [file Data_Sheet_1.docx]

**References supplementary tables :**

Agustian, F., and Sembiring, E. (2020). Occurence of Microplastics in Water, Sediment and Milkfish (Chanos chanos) in Citarum River Downstream (Case Study: Muara Gembong). in doi:[10.1051/e3sconf/202014807005](https://doi.org/10.1051/e3sconf/202014807005).

Aliabad, M. K., Nassiri, M., and Kor, K. (2019). Microplastics in the surface seawaters of Chabahar Bay, Gulf of Oman (Makran Coasts). *Marine Pollution Bulletin* 143, 125–133. doi:[10.1016/j.marpolbul.2019.04.037](https://doi.org/10.1016/j.marpolbul.2019.04.037).

Athapaththu, A. M. A. I. K., Thushari, G. G. N., Dias, P. C. B., Abeygunawardena, A. P., Egodauyana, K. P. U. T., Liyanage, N. P. P., et al. (2020). Plastics in surface water of southern coastal belt of Sri Lanka (Northern Indian Ocean): Distribution and characterization by FTIR. *Marine Pollution Bulletin* 161, 111750. doi:[10.1016/j.marpolbul.2020.111750](https://doi.org/10.1016/j.marpolbul.2020.111750).

Atwood, E. C., Falcieri, F. M., Piehl, S., Bochow, M., Matthies, M., Franke, J., et al. (2019). Coastal accumulation of microplastic particles emitted from the Po River, Northern Italy: Comparing remote sensing and hydrodynamic modelling with in situ sample collections. *Marine Pollution Bulletin* 138, 561–574. doi:[10.1016/j.marpolbul.2018.11.045](https://doi.org/10.1016/j.marpolbul.2018.11.045).

Baini, M., Fossi, M. C., Galli, M., Caliani, I., Campani, T., Finoia, M. G., et al. (2018). Abundance and characterization of microplastics in the coastal waters of Tuscany (Italy): The application of the MSFD monitoring protocol in the Mediterranean Sea. *Mar Pollut Bull* 133, 543–552. doi:[10.1016/j.marpolbul.2018.06.016](https://doi.org/10.1016/j.marpolbul.2018.06.016).

Bakir, A., Desender, M., Wilkinson, T., Van Hoytema, N., Amos, R., Airahui, S., et al. (2020). Occurrence and abundance of meso and microplastics in sediment, surface waters, and marine biota from the South Pacific region. *Marine Pollution Bulletin* 160, 111572. doi:[10.1016/j.marpolbul.2020.111572](https://doi.org/10.1016/j.marpolbul.2020.111572).

Bhuiyan, C. (2021). Water Security and Sustainability: Proceedings of Down to Earth 2019. Springer Nature.

Bikker, J., Lawson, J., Wilson, S., and Rochman, C. M. (2020). Microplastics and other anthropogenic particles in the surface waters of the Chesapeake Bay. *Marine Pollution Bulletin* 156. doi:[10.1016/j.marpolbul.2020.111257](https://doi.org/10.1016/j.marpolbul.2020.111257).

Boontanon, S., Oo, P. Z., Boontanon, N., Tanaka, S., and Shigeo, F. (2020). Abundance and Distribution of Suspended Microplastics in the Surface Water of Chao Phraya River Estuary. *1* 34, 57–66.

Brach, L., Deixonne, P., Bernard, M.-F., Durand, E., Desjean, M.-C., Perez, E., et al. (2018). Anticyclonic eddies increase accumulation of microplastic in the North Atlantic subtropical gyre. *Marine pollution bulletin* 126, 191–196. doi:[10.1016/j.marpolbul.2017.10.077](https://doi.org/10.1016/j.marpolbul.2017.10.077).

Caldwell, J., Petri-Fink, A., Rothen-Rutishauser, B., and Lehner, R. (2019). Assessing meso- and microplastic pollution in the Ligurian and Tyrrhenian Seas. *Marine Pollution Bulletin* 149, 110572. doi:[10.1016/j.marpolbul.2019.110572](https://doi.org/10.1016/j.marpolbul.2019.110572).

Camins, E., de, H., Salvo, V.-S., Canals, M., Raffard, A., and Sanchez-Vidal, A. (2020). Paddle surfing for science on microplastic pollution. *Science of the Total Environment* 709. doi:[10.1016/j.scitotenv.2019.136178](https://doi.org/10.1016/j.scitotenv.2019.136178).

Capriotti, M., Cocci, P., Bracchetti, L., Cottone, E., Scandiffio, R., Caprioli, G., et al. (2021). Microplastics and their associated organic pollutants from the coastal waters of the central Adriatic Sea (Italy): Investigation of adipogenic effects in vitro. *Chemosphere* 263, 128090. doi:[10.1016/j.chemosphere.2020.128090](https://doi.org/10.1016/j.chemosphere.2020.128090).

Carlsson, P., Singdahl-Larsen, C., and Lusher, A. L. (2021). Understanding the occurrence and fate of microplastics in coastal Arctic ecosystems: The case of surface waters, sediments and walrus (Odobenus rosmarus). *Sci Total Environ* 792, 148308. doi:[10.1016/j.scitotenv.2021.148308](https://doi.org/10.1016/j.scitotenv.2021.148308).

Carretero, O., Gago, J., Filgueiras, A. V., and Viñas, L. (2022). The seasonal cycle of micro and meso-plastics in surface waters in a coastal environment (Ría de Vigo, NW Spain). *Science of The Total Environment* 803, 150021. doi:[10.1016/j.scitotenv.2021.150021](https://doi.org/10.1016/j.scitotenv.2021.150021).

Chen, C.-F., Ju, Y.-R., Lim, Y. C., Hsu, N.-H., Lu, K.-T., Hsieh, S.-L., et al. (2020). Microplastics and their affiliated PAHs in the sea surface connected to the southwest coast of Taiwan. *Chemosphere* 254, 126818. doi:[10.1016/j.chemosphere.2020.126818](https://doi.org/10.1016/j.chemosphere.2020.126818).

Cheng, Y., Mai, L., Lu, X., Li, Z., Guo, Y., Chen, D., et al. (2021). Occurrence and abundance of poly- and perfluoroalkyl substances (PFASs) on microplastics (MPs) in Pearl River Estuary (PRE) region: Spatial and temporal variations. *Environmental Pollution* 281, 117025. doi:[10.1016/j.envpol.2021.117025](https://doi.org/10.1016/j.envpol.2021.117025).

Cheung, P. K., Fok, L., Hung, P. L., and Cheung, L. T. O. (2018). Spatio-temporal comparison of neustonic microplastic density in Hong Kong waters under the influence of the Pearl River Estuary. *Science of The Total Environment* 628–629, 731–739. doi:[10.1016/j.scitotenv.2018.01.338](https://doi.org/10.1016/j.scitotenv.2018.01.338).

Compa, M., Alomar, C., Mourre, B., March, D., Tintoré, J., and Deudero, S. (2020). Nearshore spatio-temporal sea surface trawls of plastic debris in the Balearic Islands. *Marine Environmental Research* 158. doi:[10.1016/j.marenvres.2020.104945](https://doi.org/10.1016/j.marenvres.2020.104945).

Davis, W., and Murphy, A. G. (2015). Plastic in surface waters of the Inside Passage and beaches of the Salish Sea in Washington State. *Marine Pollution Bulletin* 97, 169–177. doi:[10.1016/j.marpolbul.2015.06.019](https://doi.org/10.1016/j.marpolbul.2015.06.019).

de Carvalho, A. R., Garcia, F., Riem-Galliano, L., Tudesque, L., Albignac, M., ter Halle, A., et al. (2021). Urbanization and hydrological conditions drive the spatial and temporal variability of microplastic pollution in the Garonne River. *Science of The Total Environment* 769, 144479. doi:[10.1016/j.scitotenv.2020.144479](https://doi.org/10.1016/j.scitotenv.2020.144479).

de Haan, W. P., Sanchez-Vidal, A., and Canals, M. (2019). Floating microplastics and aggregate formation in the Western Mediterranean Sea. *Marine Pollution Bulletin* 140, 523–535. doi:[10.1016/j.marpolbul.2019.01.053](https://doi.org/10.1016/j.marpolbul.2019.01.053).

De Lucia, G. A., Vianello, A., Camedda, A., Vani, D., Tomassetti, P., Coppa, S., et al. (2018). Sea Water Contamination in the Vicinity of the Italian Minor Islands Caused by Microplastic Pollution. *Water* 10, 1108. doi:[10.3390/w10081108](https://doi.org/10.3390/w10081108).

Egessa, R., Nankabirwa, A., Ocaya, H., and Pabire, W. G. (2020). Microplastic pollution in surface water of Lake Victoria. *Science of the Total Environment* 741. doi:[10.1016/j.scitotenv.2020.140201](https://doi.org/10.1016/j.scitotenv.2020.140201).

Egger, M., Nijhof, R., Quiros, L., Leone, G., Royer, S.-J., McWhirter, A. C., et al. (2020). A spatially variable scarcity of floating microplastics in the eastern North Pacific Ocean. *Environ. Res. Lett.* 15, 114056. doi:[10.1088/1748-9326/abbb4f](https://doi.org/10.1088/1748-9326/abbb4f).

Fagiano, V., Alomar, C., Compa, M., Soto-Navarro, J., Jordá, G., and Deudero, S. (2022). Neustonic microplastics and zooplankton in coastal waters of Cabrera Marine Protected Area (Western Mediterranean Sea). *Science of The Total Environment* 804, 150120. doi:[10.1016/j.scitotenv.2021.150120](https://doi.org/10.1016/j.scitotenv.2021.150120).

Faure, F., Saini, C., Potter, G., Galgani, F., Alencastro, L. F. de, and Hagmann, P. (2015). An evaluation of surface micro- and mesoplastic pollution in pelagic ecosystems of the Western Mediterranean Sea. *Environ Sci Pollut Res* 22, 12190–12197. doi:[10.1007/s11356-015-4453-3](https://doi.org/10.1007/s11356-015-4453-3).

Fischer, E. K., Paglialonga, L., Czech, E., and Tamminga, M. (2016). Microplastic pollution in lakes and lake shoreline sediments – A case study on Lake Bolsena and Lake Chiusi (central Italy). *Environmental Pollution* 213, 648–657. doi:[10.1016/j.envpol.2016.03.012](https://doi.org/10.1016/j.envpol.2016.03.012).

Gajšt, T., Bizjak, T., Palatinus, A., Liubartseva, S., and Kržan, A. (2016). Sea surface microplastics in Slovenian part of the Northern Adriatic. *Marine Pollution Bulletin* 113, 392–399. doi:[10.1016/j.marpolbul.2016.10.031](https://doi.org/10.1016/j.marpolbul.2016.10.031).

Gewert, B., Ogonowski, M., Barth, A., and MacLeod, M. (2017). Abundance and composition of near surface microplastics and plastic debris in the Stockholm Archipelago, Baltic Sea. *Marine Pollution Bulletin* 120, 292–302. doi:[10.1016/j.marpolbul.2017.04.062](https://doi.org/10.1016/j.marpolbul.2017.04.062).

González-Pleiter, M., Velázquez, D., Edo, C., Carretero, O., Gago, J., Barón-Sola, Á., et al. (2020b). Fibers spreading worldwide: Microplastics and other anthropogenic litter in an Arctic freshwater lake. *Science of The Total Environment* 722, 137904. doi:[10.1016/j.scitotenv.2020.137904](https://doi.org/10.1016/j.scitotenv.2020.137904).

Gündoğdu, S., and Çevik, C. (2017). Micro- and mesoplastics in Northeast Levantine coast of Turkey: The preliminary results from surface samples. *Marine Pollution Bulletin* 118, 341–347. doi:[10.1016/j.marpolbul.2017.03.002](https://doi.org/10.1016/j.marpolbul.2017.03.002).

Güven, O., Gökdağ, K., Jovanović, B., and Kıdeyş, A. E. (2017). Microplastic litter composition of the Turkish territorial waters of the Mediterranean Sea, and its occurrence in the gastrointestinal tract of fish. *Environmental Pollution* 223, 286–294. doi:[10.1016/j.envpol.2017.01.025](https://doi.org/10.1016/j.envpol.2017.01.025).

Hajbane, S., and Pattiaratchi, C. B. (2017). Plastic Pollution Patterns in Offshore, Nearshore and Estuarine Waters: A Case Study from Perth, Western Australia. *Frontiers in Marine Science* 4, 63. doi:[10.3389/fmars.2017.00063](https://doi.org/10.3389/fmars.2017.00063).

Hansen, L. (2016). Macro and micro plastics in an urbanized and non-urbanized fjord estuary in the Northeast Pacific Ocean. Available at: <https://digital.lib.washington.edu:443/researchworks/handle/1773/36335> [Accessed February 23, 2022].

Hänninen, J., Weckström, M., Pawłowska, J., Szymańska, N., Uurasjärvi, E., Zajaczkowski, M., et al. (2021). Plastic debris composition and concentration in the Arctic Ocean, the North Sea and the Baltic Sea. *Marine Pollution Bulletin* 165, 112150. doi:[10.1016/j.marpolbul.2021.112150](https://doi.org/10.1016/j.marpolbul.2021.112150).

Isobe, A., Kubo, K., Tamura, Y., Kako, S., Nakashima, E., and Fujii, N. (2014). Selective transport of microplastics and mesoplastics by drifting in coastal waters. *Marine Pollution Bulletin* 89, 324–330. doi:[10.1016/j.marpolbul.2014.09.041](https://doi.org/10.1016/j.marpolbul.2014.09.041).

Kang, J.-H., Kwon, O.-Y., and Shim, W. J. (2015). Potential Threat of Microplastics to Zooplanktivores in the Surface Waters of the Southern Sea of Korea. *Arch Environ Contam Toxicol* 69, 340–351. doi:[10.1007/s00244-015-0210-3](https://doi.org/10.1007/s00244-015-0210-3).

Kashiwabara, L. M., Kahane-Rapport, S. R., King, C., DeVogelaere, M., Goldbogen, J. A., and Savoca, M. S. (2021). Microplastics and microfibers in surface waters of Monterey Bay National Marine Sanctuary, California. *Marine Pollution Bulletin* 165, 112148. doi:[10.1016/j.marpolbul.2021.112148](https://doi.org/10.1016/j.marpolbul.2021.112148).

Kowalczyk, N., Blake, N., Charko, F., and Ying, Q. Microplastics in the Maribyrnong and Yarra Rivers, Melbourne, Australia. 21. https://mwrrg.vic.gov.au/assets/resource-files/2017-PPEC-Microplastics-Report.pdf

Kwon, O. Y., Kang, J.-H., Hong, S. H., and Shim, W. J. (2020). Spatial distribution of microplastic in the surface waters along the coast of Korea. *Marine Pollution Bulletin* 155. doi:[10.1016/j.marpolbul.2019.110729](https://doi.org/10.1016/j.marpolbul.2019.110729).

Lacerda, A. L. d F., Rodrigues, L. dos S., van Sebille, E., Rodrigues, F. L., Ribeiro, L., Secchi, E. R., et al. (2019). Plastics in sea surface waters around the Antarctic Peninsula. *Sci Rep* 9, 1–12. doi:[10.1038/s41598-019-40311-4](https://doi.org/10.1038/s41598-019-40311-4).

Lacerda, A. L. d. F., Taylor, J. D., Rodrigues, L. d. S., Kessler, F., Secchi, E., and Proietti, M. C. (2022). Floating plastics and their associated biota in the Western South Atlantic. *Science of The Total Environment* 805, 150186. doi:[10.1016/j.scitotenv.2021.150186](https://doi.org/10.1016/j.scitotenv.2021.150186).

Lam, T. W. L., Fok, L., Lin, L., Xie, Q., Li, H.-X., Xu, X.-R., et al. (2020). Spatial variation of floatable plastic debris and microplastics in the Pearl River Estuary, South China. *Marine Pollution Bulletin* 158, 111383. doi:[10.1016/j.marpolbul.2020.111383](https://doi.org/10.1016/j.marpolbul.2020.111383).

Lestari, P., Trihadiningrum, Y., Wijaya, B. A., Yunus, K. A., and Firdaus, M. (2020). Distribution of microplastics in Surabaya River, Indonesia. *Science of The Total Environment* 726, 138560. doi:[10.1016/j.scitotenv.2020.138560](https://doi.org/10.1016/j.scitotenv.2020.138560).

Lf, R.-O., R, S., and J, R.-P. (2016). Floating plastic debris in the Central and Western Mediterranean Sea. *Mar Environ Res* 120, 136–144. doi:[10.1016/j.marenvres.2016.08.001](https://doi.org/10.1016/j.marenvres.2016.08.001).

Liu, Y., Zhang, J., Cai, C., He, Y., Chen, L., Xiong, X., et al. (2020). Occurrence and characteristics of microplastics in the Haihe River: An investigation of a seagoing river flowing through a megacity in northern China. *Environmental Pollution* 262. doi:[10.1016/j.envpol.2020.114261](https://doi.org/10.1016/j.envpol.2020.114261).

E. Lundsør, S. Rydbeck, M. Ibrahim, S.S. Hamis, H. Mnemba (2019) Microplastics along the Coast of Zanzıbar (2019) https://www.mwambao.or.tz/wp-content/uploads/2019/02/Microplastics-in-Zanzibar_Report-2019.pdf

Lusher, A. L., Tirelli, V., O’Connor, I., and Officer, R. (2015). Microplastics in Arctic polar waters: The first reported values of particles in surface and sub-surface samples. *Scientific Reports* 5. doi:[10.1038/srep14947](https://doi.org/10.1038/srep14947).

Lv, L., Yan, X., Feng, L., Jiang, S., Lu, Z., Xie, H., et al. (2021). Challenge for the detection of microplastics in the environment. *Water Environment Research* 93, 5–15. doi:[10.1002/wer.1281](https://doi.org/10.1002/wer.1281).

Mai, L., You, S.-N., He, H., Bao, L.-J., Liu, L.-Y., and Zeng, E. Y. (2019). Riverine Microplastic Pollution in the Pearl River Delta, China: Are Modeled Estimates Accurate? *Environmental Science and Technology* 53, 11810–11817. doi:[10.1021/acs.est.9b04838](https://doi.org/10.1021/acs.est.9b04838).

Mani, T., Hauk, A., Walter, U., and Burkhardt-Holm, P. (2015). Microplastics profile along the Rhine River. *Sci Rep* 5, 17988. doi:[10.1038/srep17988](https://doi.org/10.1038/srep17988).

Martí, E., Martin, C., Cózar, A., and Duarte, C. M. (2017). Low Abundance of Plastic Fragments in the Surface Waters of the Red Sea. *Front. Mar. Sci.* 4. doi:[10.3389/fmars.2017.00333](https://doi.org/10.3389/fmars.2017.00333).

Mohamad, N., Ismail, M., Yap, C., Kassim, K., and Ku Yaacob, K. K. (2020). Microplastics Occurrence in Waters off the Northwest Coast of Peninsular Malaysia: A Spatial Difference. *Journal of Basic & Applied Sciences* 16, 50–60. doi:[10.29169/1927-5129.2020.16.07](https://doi.org/10.29169/1927-5129.2020.16.07).

Mu, J., Zhang, S., Qu, L., Jin, F., Fang, C., Ma, X., et al. (2019). Microplastics abundance and characteristics in surface waters from the Northwest Pacific, the Bering Sea, and the Chukchi Sea. *Marine Pollution Bulletin* 143, 58–65. doi:[10.1016/j.marpolbul.2019.04.023](https://doi.org/10.1016/j.marpolbul.2019.04.023).

Munari, C., Scoponi, M., Sfriso, A. A., Sfriso, A., Aiello, J., Casoni, E., et al. (2021). Temporal variation of floatable plastic particles in the largest Italian river, the Po. *Marine Pollution Bulletin* 171, 112805. doi:[10.1016/j.marpolbul.2021.112805](https://doi.org/10.1016/j.marpolbul.2021.112805).

Naidoo, T., and Glassom, D. (2019). Sea-surface microplastic concentrations along the coastal shelf of KwaZulu–Natal, South Africa. *Marine Pollution Bulletin* 149. doi:[10.1016/j.marpolbul.2019.110514](https://doi.org/10.1016/j.marpolbul.2019.110514).

Oo, P. Z., Boontanon, S. K., Boontanon, N., Tanaka, S., and Fujii, S. (2021). Horizontal variation of microplastics with tidal fluctuation in the Chao Phraya River Estuary, Thailand. *Marine Pollution Bulletin* 173, 112933. doi:[10.1016/j.marpolbul.2021.112933](https://doi.org/10.1016/j.marpolbul.2021.112933).

Palatinus, A., Viršek, D. M. K., and Kaberi, E. (2015) DeFishGear protocols for sea surface and beach sediment sampling and sample analysis. https://mio-ecsde.org/wp-content/uploads/2014/12/Protocols-sea-surfacebeach-sediments-Feb15.pdf

Pan, Z., Liu, Q., Sun, Y., Sun, X., and Lin, H. (2019). Environmental implications of microplastic pollution in the Northwestern Pacific Ocean. *Marine Pollution Bulletin* 146, 215–224. doi:[10.1016/j.marpolbul.2019.06.031](https://doi.org/10.1016/j.marpolbul.2019.06.031).

Park, T.-J., Lee, S.-H., Lee, M.-S., Lee, J.-K., Lee, S.-H., and Zoh, K.-D. (2020). Occurrence of microplastics in the Han River and riverine fish in South Korea. *Science of The Total Environment* 708, 134535. doi:[10.1016/j.scitotenv.2019.134535](https://doi.org/10.1016/j.scitotenv.2019.134535).

Pedrotti, M. L., Bruzaud, S., Dumontet, B., Elineau, A., Petit, S., Grohens, Y., et al. (2014). Plastic fragments on the surface of Mediterranean waters. 9.

Pelamatti, T., Fonseca, I., Rios, L., Stewart, J., Marin-Enriquez, E., Hoyos, M., et al. (2019). Seasonal variation in the abundance of marine plastic debris in Banderas Bay, Mexico. *Marine Pollution Bulletin* 145, 604–610. doi:[10.1016/j.marpolbul.2019.06.062](https://doi.org/10.1016/j.marpolbul.2019.06.062).

Pelamatti, T., Rios-Mendoza, L. M., Hoyos-Padilla, E. M., Galván-Magaña, F., De Camillis, R., Marmolejo-Rodríguez, A. J., et al. (2021). Contamination knows no borders: Toxic organic compounds pollute plastics in the biodiversity hotspot of Revillagigedo Archipelago National Park, Mexico. *Marine Pollution Bulletin* 170, 112623. doi:[10.1016/j.marpolbul.2021.112623](https://doi.org/10.1016/j.marpolbul.2021.112623).

Ramírez-Álvarez, N., Rios Mendoza, L. M., Macías-Zamora, J. V., Oregel-Vázquez, L., Alvarez-Aguilar, A., Hernández-Guzmán, F. A., et al. (2020). Microplastics: Sources and distribution in surface waters and sediments of Todos Santos Bay, Mexico. *Science of The Total Environment* 703, 134838. doi:[10.1016/j.scitotenv.2019.134838](https://doi.org/10.1016/j.scitotenv.2019.134838).

Ravit, B., Cooper, K., Buckley, B., Yang, I., Deshpande, A., 1 Department of Environmental Sciences, School of Environmental and Biological Sciences, Rutgers, The State University of New Jersey, New Brunswick, NJ, USA, et al. (2019). Organic compounds associated with microplastic pollutants in New Jersey, U.S.A. surface waters. *AIMS Environmental Science* 6, 445–459. doi:[10.3934/environsci.2019.6.445](https://doi.org/10.3934/environsci.2019.6.445).

Rios-Mendoza, L. M., Ontiveros-Cuadras, J. F., Leon-Vargas, D., Ruiz-Fernández, A. C., Rangel-García, M., Pérez-Bernal, L. H., et al. (2021). Microplastic contamination and fluxes in a touristic area at the SE Gulf of California. *Marine Pollution Bulletin* 170, 112638. doi:[10.1016/j.marpolbul.2021.112638](https://doi.org/10.1016/j.marpolbul.2021.112638).

Ripken, C., Kotsifaki, D., and Nic Chormaic, S. (2021). Analysis of small microplastics in coastal surface water samples of the subtropical island of Okinawa, Japan. *Science of The Total Environment* 760, 143927. doi:[10.1016/j.scitotenv.2020.143927](https://doi.org/10.1016/j.scitotenv.2020.143927).

Robin, R. S., Karthik, R., Purvaja, R., Ganguly, D., Anandavelu, I., Mugilarasan, M., et al. (2020). Holistic assessment of microplastics in various coastal environmental matrices, southwest coast of India. *Science of The Total Environment* 703, 134947. doi:[10.1016/j.scitotenv.2019.134947](https://doi.org/10.1016/j.scitotenv.2019.134947).

Rodrigues, D., Antunes, J., Otero, V., Sobral, P., and Costa, M. H. (2020). Distribution Patterns of Microplastics in Seawater Surface at a Portuguese Estuary and Marine Park. *Frontiers in Environmental Science* 8, 254. doi:[10.3389/fenvs.2020.582217](https://doi.org/10.3389/fenvs.2020.582217).

Ronda, A. C., Arias, A. H., Oliva, A. L., and Marcovecchio, J. E. (2019). Synthetic microfibers in marine sediments and surface seawater from the Argentinean continental shelf and a Marine Protected Area. *Marine Pollution Bulletin* 149, 110618. doi:[10.1016/j.marpolbul.2019.110618](https://doi.org/10.1016/j.marpolbul.2019.110618).

Rose, D., and Webber, M. (2019). Characterization of microplastics in the surface waters of Kingston Harbour. *Science of the Total Environment* 664, 753–760. doi:[10.1016/j.scitotenv.2019.01.319](https://doi.org/10.1016/j.scitotenv.2019.01.319).

Ruiz-Orejón, L. F., Sardá, R., and Ramis-Pujol, J. (2016). Floating plastic debris in the Central and Western Mediterranean Sea. *Marine Environmental Research* 120, 136–144. doi:[10.1016/j.marenvres.2016.08.001](https://doi.org/10.1016/j.marenvres.2016.08.001).

Ruiz-Orejón, L. F., Sardá, R., and Ramis-Pujol, J. (2018). Now, you see me: High concentrations of floating plastic debris in the coastal waters of the Balearic Islands (Spain). *Marine Pollution Bulletin* 133, 636–646. doi:[10.1016/j.marpolbul.2018.06.010](https://doi.org/10.1016/j.marpolbul.2018.06.010).

Santillo, D., Miller, K., and Johnston, P. (2017). Microplastics as contaminants in commercially important seafood species. *Integrated Environmental Assessment and Management* 13, 516–521. doi:[10.1002/ieam.1909](https://doi.org/10.1002/ieam.1909).

Sari Erkan, H., Bakaraki Turan, N., Albay, M., and Onkal Engin, G. (2021). A preliminary study on the distribution and morphology of microplastics in the coastal areas of Istanbul, the metropolitan city of Turkey: The effect of location differences. *Journal of Cleaner Production* 307, 127320. doi:[10.1016/j.jclepro.2021.127320](https://doi.org/10.1016/j.jclepro.2021.127320).

Setälä, O., Magnusson, K., Lehtiniemi, M., and Norén, F. (2016). Distribution and abundance of surface water microlitter in the Baltic Sea: A comparison of two sampling methods. *Marine Pollution Bulletin* 110, 177–183. doi:[10.1016/j.marpolbul.2016.06.065](https://doi.org/10.1016/j.marpolbul.2016.06.065).

Schmidt, N., Thibault, D., Galgani, F., Paluselli, A., and Sempéré, R. (2018). Occurrence of microplastics in surface waters of the Gulf of Lion (NW Mediterranean Sea). *Progress in Oceanography* 163, 214–220. doi:[10.1016/j.pocean.2017.11.010](https://doi.org/10.1016/j.pocean.2017.11.010).

Schönlau, C., Karlsson, T. M., Rotander, A., Nilsson, H., Engwall, M., van, B., et al. (2020). Microplastics in sea-surface waters surrounding Sweden sampled by manta trawl and in-situ pump. *Marine Pollution Bulletin* 153. doi:[10.1016/j.marpolbul.2020.111019](https://doi.org/10.1016/j.marpolbul.2020.111019).

Setiti, S., Hamdi, B., Chernai, S., Bachari, F. H., Bachouche, S., Ghezali, Y., et al. (2021). Seasonal variation of microplastics density in Algerian surface waters (South-Western Mediterranean Sea). *Mediterranean Marine Science* 22, 317–326. doi:[10.12681/mms.24899](https://doi.org/10.12681/mms.24899).

Sighicelli, M., Pietrelli, L., Lecce, F., Iannilli, V., Falconieri, M., Coscia, L., et al. (2018). Microplastic pollution in the surface waters of Italian Subalpine Lakes. *Environmental Pollution* 236, 645–651. doi:[10.1016/j.envpol.2018.02.008](https://doi.org/10.1016/j.envpol.2018.02.008).

Silvestrova, K., and Stepanova, N. (2021). The distribution of microplastics in the surface layer of the Atlantic Ocean from the subtropics to the equator according to visual analysis. *Marine Pollution Bulletin* 162, 111836. doi:[10.1016/j.marpolbul.2020.111836](https://doi.org/10.1016/j.marpolbul.2020.111836).

Singh, V., and Chakraborty, S. (2021). Quantification and Characterization of Microplastics in Kanke Lake, a Freshwater System of Ranchi, Jharkhand, India. in *Water Security and Sustainability* Lecture Notes in Civil Engineering., eds. C. Bhuiyan, W.-A. Flügel, and S. K. Jain (Singapore: Springer), 271–281. doi:[10.1007/978-981-15-9805-0_23](https://doi.org/10.1007/978-981-15-9805-0_23).

Smith, J. A., Hodge, J., and Garver, J. I. (2017). The Distribution of Microplastic Pollution in the Mohawk River. 67–71. https://www.researchgate.net/profile/John-Garver/publication/314543747_Proceedings_of_the_2017_Mohawk_Watershed_Symposium_Union_College_Schenectady_NY_17_Mb/links/58c339a8aca272e36dd0467c/Proceedings-of-the-2017-Mohawk-Watershed-Symposium-Union-College-Schenectady-NY-17-Mb.pdf#page=78

Song, Y.-K., Hong, S., Jang, M., Han, G., and Shim, W. (2015). Occurrence and Distribution of Microplastics in the Sea Surface Microlayer in Jinhae Bay, South Korea. *Archives of environmental contamination and toxicology* 69. doi:[10.1007/s00244-015-0209-9](https://doi.org/10.1007/s00244-015-0209-9).

Sul, J. A. I. do, Costa, M. F., and Fillmann, G. (2014). Microplastics in the pelagic environment around oceanic islands of the Western Tropical Atlantic Ocean. *Water Air Soil Pollut* 225, 1–13. doi:[10.1007/s11270-014-2004-z](https://doi.org/10.1007/s11270-014-2004-z).

Suteja, Y., Atmadipoera, A. S., Riani, E., Nurjaya, I. W., Nugroho, D., and Cordova, M. R. (2021). Spatial and temporal distribution of microplastic in surface water of tropical estuary: Case study in Benoa Bay, Bali, Indonesia. *Marine Pollution Bulletin* 163, 111979. doi:[10.1016/j.marpolbul.2021.111979](https://doi.org/10.1016/j.marpolbul.2021.111979).

Syakti, A. D., Bouhroum, R., Hidayati, N. V., Koenawan, C. J., Boulkamh, A., Sulistyo, I., et al. (2017). Beach macro-litter monitoring and floating microplastic in a coastal area of Indonesia. *Marine Pollution Bulletin* 122, 217–225. doi:[10.1016/j.marpolbul.2017.06.046](https://doi.org/10.1016/j.marpolbul.2017.06.046).

Tamminga, M., Hengstmann, E., and Fischer, E. K. (2018). Microplastic analysis in the South Funen Archipelago, Baltic Sea, implementing manta trawling and bulk sampling. *Marine Pollution Bulletin* 128, 601–608. doi:[10.1016/j.marpolbul.2018.01.066](https://doi.org/10.1016/j.marpolbul.2018.01.066).

Tesán Onrubia, J. A., Djaoudi, K., Borgogno, F., Canuto, S., Angeletti, B., Besio, G., et al. (2021). Quantification of Microplastics in North-Western Mediterranean Harbors: Seasonality and Biofilm-Related Metallic Contaminants. *Journal of Marine Science and Engineering* 9, 337. doi:[10.3390/jmse9030337](https://doi.org/10.3390/jmse9030337).

Tokai, T., Uchida, K., Kuroda, M., and Isobe, A. (2021). Mesh selectivity of neuston nets for microplastics. MAR. POLLUT. BULL., MAR. POLLUT. BULL., VOL, 11, MAR. POLLUTION BULL., Marine pollution bulletin, Marine Pollution Bulletin,, Marine pollution bulletin. 165, 112111. doi:[10.1016/j.marpolbul.2021.112111](https://doi.org/10.1016/j.marpolbul.2021.112111).

Tošić, T. N., Vruggink, M., and Vesman, A. (2020). Microplastics quantification in surface waters of the Barents, Kara and White Seas. *Marine Pollution Bulletin* 161. doi:[10.1016/j.marpolbul.2020.111745](https://doi.org/10.1016/j.marpolbul.2020.111745).

Tunçer, S., Artüz, O. B., Demirkol, M., and Artüz, M. L. (2018). First report of occurrence, distribution, and composition of microplastics in surface waters of the Sea of Marmara, Turkey. *Marine Pollution Bulletin* 135, 283–289. doi:[10.1016/j.marpolbul.2018.06.054](https://doi.org/10.1016/j.marpolbul.2018.06.054).

van der Hal, N., Ariel, A., and Angel, D. L. (2017). Exceptionally high abundances of microplastics in the oligotrophic Israeli Mediterranean coastal waters. *Marine Pollution Bulletin* 116, 151–155. doi:[10.1016/j.marpolbul.2016.12.052](https://doi.org/10.1016/j.marpolbul.2016.12.052).

Vermaire, J. C., Pomeroy, C., Herczegh, S. M., Haggart, O., and Murphy, M. (2017). Microplastic abundance and distribution in the open water and sediment of the Ottawa River, Canada, and its tributaries. *FACETS*. doi:[10.1139/facets-2016-0070](https://doi.org/10.1139/facets-2016-0070).

Watkins, L., Sullivan, P. J., and Walter, M. T. (2021). What You Net Depends on if You Grab: A Meta-analysis of Sampling Method’s Impact on Measured Aquatic Microplastic Concentration. *Environ. Sci. Technol.* 55, 12930–12942. doi:[10.1021/acs.est.1c03019](https://doi.org/10.1021/acs.est.1c03019).

Weideman, E. A., Perold, V., and Ryan, P. G. (2019). Little evidence that dams in the Orange–Vaal River system trap floating microplastics or microfibres. *Marine Pollution Bulletin* 149, 110664. doi:[10.1016/j.marpolbul.2019.110664](https://doi.org/10.1016/j.marpolbul.2019.110664).

Yonkos, L. T., Friedel, E. A., Perez-Reyes, A. C., Ghosal, S., and Arthur, C. D. (2014). Microplastics in Four Estuarine Rivers in the Chesapeake Bay, U.S.A. *Environ. Sci. Technol.* 48, 14195–14202. doi:[10.1021/es5036317](https://doi.org/10.1021/es5036317).

Zeri, C., Adamopoulou, A., Bojanić, V., Fortibuoni, T., Kovač, V., Kržan, A., et al. (2018). Floating plastics in Adriatic waters (Mediterranean Sea): From the macro- to the micro-scale. *Marine Pollution Bulletin* 136, 341–350. doi:[10.1016/j.marpolbul.2018.09.016](https://doi.org/10.1016/j.marpolbul.2018.09.016).

Zeri, C., Adamopoulou, A., Koi, A., Koutsikos, N., Lytras, E., and Dimitriou, E. (2021). Rivers and Wastewater-Treatment Plants as Microplastic Pathways to Eastern Mediterranean Waters: First Records for the Aegean Sea, Greece. *Sustainability* 13, 5328. doi:[10.3390/su13105328](https://doi.org/10.3390/su13105328).

Zhang, W., Zhang, S., Zhao, Q., Qu, L., Ma, D., and Wang, J. (2020). Spatio-temporal distribution of plastic and microplastic debris in the surface water of the Bohai Sea, China. *Marine Pollution Bulletin* 158, 111343. doi:[10.1016/j.marpolbul.2020.111343](https://doi.org/10.1016/j.marpolbul.2020.111343).

Zhu, X., Munno, K., Grbic, J., Werbowski, L. M., Bikker, J., Ho, A., et al. (2021). Holistic Assessment of Microplastics and Other Anthropogenic Microdebris in an Urban Bay Sheds Light on Their Sources and Fate. *ACS EST Water* 1, 1401–1410. doi:[10.1021/acsestwater.0c00292](https://doi.org/10.1021/acsestwater.0c00292).
