# Supplementary material for: Manta Net: The Golden Method for Sampling Surface Water Microplastics in Aquatic Environments
Source: Frontiers journal article supplement (doi:10.3389/fenvs.2022.811112), 2022-04-01
Supplement: Table_2.xlsx [file Table_2.xlsx]

## Sheet: Feuil1
TableS2. Overview of microplastic studies that used the manta net in freshwater (N.A. is noted when information was not communicated)
Manta sampling characteristics						Results data
Sampling speed	Sampling duration	Sampling distance	Manta’s dimensions	Mesh size	Precise water height sampled	Volume sampled	Number of particles	Type of polymer	Geographic location	References	Replicates
known	12-30min	N.A.	30*15cm	300µm	7.5cm	N.A.	1.62±0.61*105 to 4.25±3.87 × 106 items/km2	PP,PE,PS,PE-PP,PVC,PC,nylon	Yangtze River (China)	He et al. 2021	N.A.
N.A.	25min	N.A.	N.A.	330µm	N.A.	Known	1.77-27.73 items/m3	PE,PP,PVAc,PS, PVC, POM, PET, TPE, PU	Kifissos Attica River, Pinios Thessaly River (Greece)	Zeri et al. 2021	2
1.5 knots	10min	N.A.	30*70cm	60µm	Top 24cm	35	11.9 ± 0.6 to 61.2 ± 6.1 items m−3	Mainly PP and PE	Lake Guaíba (Brazil)	Bertoldi et al. 2021	None
2 knots	N.A.	~1km	60cm*16cm	335µm	top 8 cm	48 to 51	0.34 particles/m3	Mainly PE and PP; also PS, rayons , PEUR PVC	Lake Simcoe (Canada)	Felismino et al. 2021	None
0 knots	20-30min	0m	N.A.	330µm	15cm	N.A.	51.2 MPs/m3	N.A.	Ob river, Russia	Frank et al. 2021	3
2 knots	N.A.	296.1 m to 1563.0 m	50*100cm	333µm	N.A.	N.A.	14.17 ± 14.64 items/m3	PE, PA, PP, PS, PEUR	Haihe river (China)	Liu et al. 2020	2
N.A.	30min	N.A.	N.A.	125µm	N.A.	Known	1.333 ± 1.155 particles/l	Mainly PE and PP	Citarum River, Indonesia	Sembiring et al. 2020	N.A.
0	5min	N.A.	15*30cm	300µm	N.A.	Known	10.1 ± 5.1 to 70.5 ± 30.6 p/m3 and 6.7 ± 2.4 to 83.7 ± 70.8 and 2.8 ± 1.2 to 64.4 ± 76.2 p/m3	N.A.	Dahan, Keelung Tamsui and Xindian rivers (Taiwan)	Wong et al. 2020	N.A.
3 knots	N.A.	N.A.	30*100*250cm	125µm	N.A.	N.A.	2.58 x 105 p/km2	Mainly PE and PP	Jatiluhur Reservoir (Indonesia)	Ramadan et Sembring 2020	N.A.
2.5 knots	10min	N.A.	16*61cm	333µm	16cm	58 ± 14	0.27 ± 0.18 MPs/m3	PE, PP, PMMA, PVC, PET, PS	Lake Kallavesi (Finland)	Uurasjärvi et al. 2020	None
1-5 knots	30min	N.A.	20*50*200cm	300µm	N.A.	Known	104 MPs/m3	PP, PE, PS, Polyester	chao phraya river, Bangkok Thailand	Ta et al. 2020	N.A.
None	15-60min	None	60*25cm	333µm	20cm	191 ± 144	12 ± 18 Têt and 42 ± 18 p/m3 Rhône	N.A.	Rhône and Têt river	Constant et al. 2020	N.A.
2 knots	20min	N.A.	16*87cm	333µm	N.A.	Known	0.688 to 8.221 n/m3	Mainly, PE, PP and PS	Pearl River Estuary, South China	Wing Ling Lam et al. 2020	1
N.A.	20min	N.A.	16*61*300cm	333µm	16-30cm	N.A.	1.47 to 43.11 particles/m3	LDPE, PP, PE, PS	Surabaya river, Indonesia	Lestari et al. 2020	N.A.
None	15min	N.A.	30*50cm	250µm	N.A.	N.A.	<1 and 44.8 items/m3	Mainly PS	Streams around New Zealand	Mora- Teddy et al. 2020	0-2
3 knots	25-30min	N.A.	30*15cm	335µm	N.A.	Known	2.33.105 particles/km2	PP, LDPE and PE	Chao Phraya River Estuary	Boontanon et al. 2020	N.A.
N.A.	N.A.	N.A.	N.A.	100µm	N.A.	3 to 5	5.3–87.3 particles/m3	N.A.	Tanchon stream Han River, Korea	Park et al. 2020	N.A.
2 knots	15-20min	N.A.	50*100cm	330µm	N.A.	Known	0.127 p/m3	Mainly PE and PP	Pearl river delta, (China)	Mai et al. 2019	N.A.
None	10min	None	25 and 10cm mouth opening	355µm	N.A.	7.7 to 5	N.A.	N.A.	Pasig river	Deocaris et al. 2019	N.A.
N.A.	20min	N.A.	N.A.	300µm	N.A.	N.A.	1 to 84 particles/m3	Mainly, PE PP and PS	Po river, Italy	Atwood et al. 2019	N.A.
walking speed	15min	403 ± 47 m	30*60cm	300µm	N.A.	N.A.	0.04 ± 0.16 items·m−2	N.A.	Orange–Vaal River	Weideman et al. 2019	N.A.
N.A.	N.A.	N.A.	35*20*300cm	125µm	N.A.	N.A.	300 MPs for 100m3	Mainly PP and PE	Kanke Lake, Ranchi, Jharkhand, India	Singh et al.. 2019	N.A.
3 knots	Known	N.A.	20*60cm	300µm	20cm	240	25000-40000 MPS/km2	Mainly PE, PP and PS	Italian Subalpine Lakes	Sighicelli et al. 2018	N.A.
N.A.	N.A.	500-2000m	14*85*300cm	333µm	N.A.	Known	91 to 3538 mg*km−2	PVC, PE, PET, PP	Western Lake Superior, USA	Hendrickson et al. 2018	N.A.
N.A.	20min	N.A.	N.A.	100μm	N.A.	128	1.99MPs /m3-0.71MPs /m3	N.A.	Ottawa River	Vermaire et al. 2017	3
2.2-3.75 knots	N.A.	530m to 3780m	18*61*300cm	333µm	N.A.	N.A.	748,000 Mps/km2 to 53,000 MPs/km2	N.A.	Lake Winnipeg	Anderson et al. 2017	N.A.
N.A.	15min	N.A.	16*61*300cm	333µm	N.A.	Known	~2,8 *104 to over 3*106 particles km−2	N.A.	New Jersey freshwaters, USA	Ravit et al. 2017	N.A.
None	N.A.	None	18*61*295cm	333µm	N.A.	N.A.	632,489 and 812,672 microplastics/km2	N.A.	Lake Winnipeg, Canada	Warrack et al. 2017	N.A.
4.5 knots	N.A.	1.71km	N.A.	333µm	N.A.	N.A.	0.003 to 0.743 particles/m2	N.A.	Mohawk River	Smith et al. 2017	N.A.
Same speed	30min	N.A.	20*60*300cm	330µm	N.A.	N.A.	442,905,600 litter items per year	N.A.	Maribyrnong and Yarra rivers, Melbourne, Australia	Kowalczyk et al. 2017	N.A.
2 knots	20min	N.A.	16*61*300cm	100µm	N.A.	Known	1,910,562 MPs km−2 to 126,933 MPs km−2	N.A.	Great lakes, Northern America	Cable et al. 2017	N.A.
2.6 knots	60min	4-5km	60*18.5cm	330µm	N.A.	N.A.	2.68 and 3.36 p/m3	N.A.	Lake Bolsena and Lake Chiusi (central Italy)	Fischer et al. 2016	N.A.
N.A.	10min	N.A.	18*60cm	300µm	N.A.	25.2 to 200.9	0.04–9.97 MP m−3	Mainly PE and PP	Rhine River	Mani et Burkhardt-Holm 2015	N.A.
2 knots	60min	2-4km	16*61*300cm	333µm	N.A.	N.A.	43,157 MPs/km2	N.A.	Laurentian Great Lakes	Eriksen et al. 2013	N.A.
